# Supplementary material for: Effects of Reduced Phosphate Fertilizer and Increased Trichoderma Application on the Growth, Yield, and Quality of Pepper
Source: MDPI journal article supplement (doi:10.3390/plants12162998), 2023-08-19
Supplement: s1 [file s1]

Table S1 Effects of different levels of phosphate, *Trichoderma*, and their interaction on plant growth

| Green fruit stage    | Different levels of phosphate |              | <i>Trichoderma</i> |              | Different levels of phosphate * |              | Red fruit stage      | Different levels of phosphate |              | <i>Trichoderma</i> |              | Different levels of phosphate * |              |
|----------------------|-------------------------------|--------------|--------------------|--------------|---------------------------------|--------------|----------------------|-------------------------------|--------------|--------------------|--------------|---------------------------------|--------------|
|                      |                               |              |                    |              |                                 |              |                      |                               |              |                    |              |                                 |              |
|                      | <i>F</i>                      | <i>P</i>     | <i>F</i>           | <i>P</i>     | <i>F</i>                        | <i>P</i>     |                      | <i>F</i>                      | <i>P</i>     | <i>F</i>           | <i>P</i>     | <i>F</i>                        | <i>P</i>     |
| Plant height         | 3.498                         | <b>0.04</b>  | 6.069              | <b>0.025</b> | 1.053                           | 0.396        | Plant height         | 1.246                         | 0.326        | 8.103              | 0.012        | 0.13                            | 0.941        |
| Stem diameter        | 1.919                         | 0.167        | 13.431             | <b>0.002</b> | 0.716                           | 0.557        | Stem diameter        | 1.514                         | 0.249        | 3.535              | 0.078        | 0.572                           | 0.641        |
| SPAD                 | 5.418                         | <b>0.009</b> | 31.611             | <b>0.000</b> | 0.473                           | 0.705        | SPAD                 | 3.108                         | 0.056        | 0.871              | 0.364        | 0.554                           | 0.653        |
| Dry weight of roots  | 2.564                         | <b>0.091</b> | 2.666              | <b>0.122</b> | 1.602                           | 0.228        | Dry weight of roots  | 12.251                        | <b>0.000</b> | 18.846             | <b>0.001</b> | 0.641                           | 0.600        |
| Dry weight of stems  | 4.747                         | <b>0.015</b> | 4.543              | <b>0.049</b> | 0.586                           | 0.633        | Dry weight of stems  | 44.453                        | <b>0.000</b> | 693.338            | <b>0.000</b> | 48.437                          | <b>0.000</b> |
| Dry weight of leave  | 1.449                         | 0.266        | 8.348              | <b>0.011</b> | 2.121                           | 0.138        | Dry weight of leave  | 38.009                        | <b>0.000</b> | 432.496            | <b>0.000</b> | 11.671                          | <b>0.000</b> |
| Dry weight of fruits | 1.464                         | 0.262        | 30.620             | <b>0.000</b> | 6.108                           | <b>0.006</b> | Dry weight of fruits | 8.378                         | <b>0.001</b> | 104.524            | <b>0.000</b> | 0.687                           | 0.573        |

Note: \* $p < 0.05$ ; \*\* $p < 0.01$ ; \*\*\* $p < 0.001$ , For each parameter,  $p < 0.05$  is in bold.

Table S2 Effects of different levels of phosphate, *Trichoderma*, and their interaction on plant nutrition

| Green fruit stage            | Different levels of phosphate |              | <i>Trichoderma</i> |              | Different levels of phosphate * |              | Red fruit stage              | Different levels of phosphate |              | <i>Trichoderma</i> |              | Different levels of phosphate * |              |
|------------------------------|-------------------------------|--------------|--------------------|--------------|---------------------------------|--------------|------------------------------|-------------------------------|--------------|--------------------|--------------|---------------------------------|--------------|
|                              |                               |              |                    |              | <i>Trichoderma</i>              |              |                              |                               |              |                    |              | <i>Trichoderma</i>              |              |
|                              | <i>F</i>                      | <i>P</i>     | <i>F</i>           | <i>P</i>     | <i>F</i>                        | <i>P</i>     |                              | <i>F</i>                      | <i>P</i>     | <i>F</i>           | <i>P</i>     | <i>F</i>                        | <i>P</i>     |
| The N content of whole plant | 3.871                         | <b>0.03</b>  | 42.289             | <b>0.000</b> | 12.153                          | <b>0.000</b> | The N content of whole plant | 23.484                        | <b>0.000</b> | 159.153            | <b>0.000</b> | 24.469                          | <b>0.000</b> |
| The P content of whole plant | 4.317                         | <b>0.021</b> | 47.057             | <b>0.000</b> | 8.445                           | <b>0.001</b> | The P content of whole plant | 46.159                        | <b>0.000</b> | 437.041            | <b>0.000</b> | 11.033                          | <b>0.000</b> |
| The K content of whole plant | 3.446                         | <b>0.042</b> | 42.349             | <b>0.000</b> | 9.24                            | <b>0.001</b> | The K content of whole plant | 34.722                        | <b>0.000</b> | 297.861            | <b>0.000</b> | 3.448                           | <b>0.042</b> |

Note: \* $p < 0.05$ ; \*\* $p < 0.01$ ; \*\*\* $p < 0.001$ , For each parameter,  $p < 0.05$  is in bold.

Table S3 Effects of different levels of phosphate, *Trichoderma*, and their interaction on pepper fruit quality

| Green fruit stage | Different levels of<br>phosphate |              | <i>Trichoderma</i> |                    | Different levels of<br>phosphate * |              | Red fruit stage | Different levels of<br>phosphate |              | <i>Trichoderma</i> |              | Different levels of<br>phosphate * |              |
|-------------------|----------------------------------|--------------|--------------------|--------------------|------------------------------------|--------------|-----------------|----------------------------------|--------------|--------------------|--------------|------------------------------------|--------------|
|                   |                                  |              | <i>Trichoderma</i> | <i>Trichoderma</i> |                                    |              |                 |                                  |              |                    |              |                                    |              |
|                   | <i>F</i>                         | <i>P</i>     | <i>F</i>           | <i>P</i>           | <i>F</i>                           | <i>P</i>     |                 | <i>F</i>                         | <i>P</i>     | <i>F</i>           | <i>P</i>     |                                    |              |
| Soluble protein   | 0.830                            | 0.497        | 14.724             | <b>0.001</b>       | 1.880                              | 0.174        | Soluble protein | 14.759                           | <b>0.000</b> | 7.757              | <b>0.013</b> | 0.376                              | 0.772        |
| Vitamin C         | 373.672                          | <b>0.000</b> | 23.434             | <b>0.000</b>       | 469.458                            | <b>0.000</b> | Vitamin C       | 39.240                           | <b>0.000</b> | 48.440             | <b>0.000</b> | 8.191                              | <b>0.002</b> |
| Soluble sugar     | 3.298                            | <b>0.048</b> | 2.263              | 0.152              | 2.891                              | 0.068        | Soluble sugar   | 8.988                            | <b>0.001</b> | 19.439             | <b>0.000</b> | 0.710                              | 0.560        |
| Capsaicin         | 78.884                           | <b>0.000</b> | 295.505            | 0.000              | 76.739                             | <b>0.000</b> | Capsaicin       | 21.715                           | <b>0.000</b> | 61.634             | <b>0.000</b> | 24.916                             | <b>0.000</b> |
| Capsanthin        | 18.345                           | <b>0.000</b> | 11.929             | <b>0.003</b>       | 5.270                              | <b>0.010</b> | Capsanthin      | 63.057                           | <b>0.000</b> | 51.586             | <b>0.000</b> | 26.744                             | <b>0.000</b> |

Note: \* $p < 0.05$ ; \*\* $p < 0.01$ ; \*\*\* $p < 0.001$ , For each parameter,  $p < 0.05$  is in bold.

Table S4 Effects of different levels of phosphate, *Trichoderma*, and their interaction on soil fertility

| Green fruit stage           | Different levels of<br>phosphate |              | <i>Trichoderma</i> |              | Different levels of<br>phosphate * |              | Red fruit stage             | Different levels of<br>phosphate |              | <i>Trichoderma</i> |              | Different levels of<br>phosphate * |              |
|-----------------------------|----------------------------------|--------------|--------------------|--------------|------------------------------------|--------------|-----------------------------|----------------------------------|--------------|--------------------|--------------|------------------------------------|--------------|
|                             |                                  |              |                    |              |                                    |              |                             |                                  |              |                    |              |                                    |              |
|                             | <i>F</i>                         | <i>P</i>     | <i>F</i>           | <i>P</i>     | <i>F</i>                           | <i>P</i>     |                             | <i>F</i>                         | <i>P</i>     | <i>F</i>           | <i>P</i>     | <i>F</i>                           | <i>P</i>     |
| Total N content             | 2.323                            | 0.114        | 0.001              | 0.980        | 9.439                              | <b>0.001</b> | Total N content             | 4.568                            | <b>0.017</b> | 2.291              | 0.150        | 6.815                              | <b>0.004</b> |
| Alkali hydrolyzed N content | 1.977                            | 0.158        | 0.882              | 0.362        | 6.562                              | <b>0.004</b> | Alkali hydrolyzed N content | 3.680                            | <b>0.034</b> | 11.757             | 0.204        | 0.440                              | 0.728        |
| Total P content             | 12.800                           | <b>0.000</b> | 1.285              | 0.274        | 15.116                             | 0.000        | Total P content             | 48.206                           | <b>0.000</b> | 9.540              | <b>0.007</b> | 76.023                             | <b>0.000</b> |
| Available P content         | 7.592                            | <b>0.002</b> | 4.239              | 0.056        | 1.214                              | 0.337        | Available P content         | 10.055                           | <b>0.001</b> | 8.892              | <b>0.009</b> | 21.139                             | <b>0.000</b> |
| Total K content             | 15.454                           | <b>0.000</b> | 8.696              | <b>0.009</b> | 1.817                              | 0.185        | Total K content             | 0.293                            | 0.830        | 2.605              | 0.126        | 3.519                              | <b>0.039</b> |
| Available K content         | 14.035                           | <b>0.000</b> | 182.911            | <b>0.000</b> | 23.140                             | <b>0.000</b> | Available K content         | 6.274                            | <b>0.005</b> | 11.588             | 0.004        | 3.925                              | <b>0.028</b> |

Note: \* $p < 0.05$ ; \*\* $p < 0.01$ ; \*\*\* $p < 0.001$ , For each parameter,  $p < 0.05$  is in bold.
